# Supplementary material for: A Proteome-Wide Association Study Identified Candidate Human Brain Proteins Associated with Coffee Consumption
Source: Research Square preprint supplement (doi:10.21203/rs.3.rs-910538/v1), 2021-09-28
Supplement: Supplementary file 1 [file 9fc542ac26c4a44d82df2975.xlsx]

## Sheet: Table S1
Supplementary table 1：Phenotypes and annotations in discovery and replication cohorts
	Trait	Annotation	Abbreviation
discovery cohort	1498	Coffee intake	Coffee intake
	1508_1	Coffee type: Decaffeinated coffee (any type)	Coffee type 1
	1508_2	Coffee type: Instant coffee	Coffee type 2
	1508_3	Coffee type: Ground coffee (include espresso, filter etc)	Coffee type 3
	1508_4	Coffee type: Other type of coffee	Coffee type 4
	100240	Coffee consumed	Coffee consumed
	100250	Instant coffee intake	Instant coffee intake
	100260	Added milk to instant coffee	Added milk to instant coffee
	100270	Filtered coffee intake	Filtered coffee intake
	100280	Added milk to filtered coffee	Added milk to filtered coffee
	100360	Decaffeinated coffee	Decaffeinated coffee
	100370	Intake of sugar added to coffee	Intake of sugar added to coffee
replication cohort	coffcaff	Coffee consumption among drinkers	Coffee consumption among drinkers
	coffext	extreme coffee trait: heavy ('case') vs no/low ('control') regular coffee consumption	extreme coffee trait

## Sheet: Table S2
Supplementary table 2: significant genetic associations between coffee consumption and human plasma proteins in discovery cohort
p1	p2	rg	se	z	p
Coffee intake	IgG4, Kappa	0.3251	0.1157	2.8083	0.005
Coffee intake	F177A	0.1982	0.0901	2.2	0.0278
Coffee intake	Met	0.3928	0.1825	2.1518	0.0314
Coffee intake	H6ST2	0.2973	0.1398	2.1264	0.0335
Coffee intake	P5I11	-0.3436	0.1616	-2.1261	0.0335
Coffee intake	MDM1	0.2341	0.1116	2.0984	0.0359
Coffee intake	RSPO3	0.2906	0.1394	2.0847	0.0371
Coffee intake	SCGF-beta	0.2557	0.1238	2.0664	0.0388
Coffee intake	DLDH	0.3589	0.1763	2.0354	0.0418
Coffee intake	CgA	0.2059	0.1017	2.0255	0.0428
Coffee consumed	resistin	-0.7262	0.2854	-2.5446	0.0109
Coffee consumed	sICAM-3	-0.7367	0.308	-2.3916	0.0168
Coffee consumed	RNF43	-0.5211	0.2279	-2.2862	0.0222
Coffee consumed	CD70	-0.8617	0.3857	-2.2341	0.0255
Coffee consumed	CH3L2	-0.8801	0.394	-2.2336	0.0255
Coffee consumed	Lipocalin 2	-0.8807	0.4235	-2.0796	0.0376
Coffee consumed	Factor H	-0.451	0.2197	-2.0528	0.0401
Coffee consumed	TrATPase	-0.7347	0.3586	-2.049	0.0405
Coffee consumed	MMP-17	-0.7812	0.3817	-2.0466	0.0407
Coffee consumed	RIR2B	-0.6327	0.3113	-2.0323	0.0421
Coffee consumed	NovH	-0.5085	0.2531	-2.009	0.0445
Coffee consumed	MUSK	-0.5772	0.2877	-2.0064	0.0448
Coffee consumed	Cathepsin B	-0.4606	0.232	-1.9856	0.0471
Coffee consumed	SPHK2	-0.655	0.3302	-1.9835	0.0473
Instant coffee intake	resistin	-0.7877	0.2968	-2.6535	0.008
Instant coffee intake	B4GT3	-1.1336	0.4886	-2.3201	0.0203
Instant coffee intake	SAP	-0.8859	0.3974	-2.2291	0.0258
Instant coffee intake	RN148	-1.0076	0.4522	-2.2282	0.0259
Instant coffee intake	CDY1	-0.6097	0.285	-2.1392	0.0324
Instant coffee intake	LTBP4	1.0026	0.4701	2.1329	0.0329
Instant coffee intake	BMP-7	0.7199	0.3503	2.055	0.0399
Instant coffee intake	Lipocalin 2	-0.8552	0.419	-2.0411	0.0412
Filtered coffee intake	TPST2	-0.6362	0.2737	-2.3244	0.0201
Filtered coffee intake	TFF1	0.4438	0.2077	2.1363	0.0327
Filtered coffee intake	IDUA	-0.6829	0.3316	-2.0596	0.0394
Filtered coffee intake	CXCL16, soluble	-0.4942	0.2445	-2.0211	0.0433
Filtered coffee intake	TrATPase	-0.4471	0.2231	-2.0042	0.045
Filtered coffee intake	CRHBP	-0.4797	0.2415	-1.9863	0.047
Filtered coffee intake	Factor H	-0.3635	0.1839	-1.9772	0.048
Added milk to filtered coffee	CHL1	0.803	0.3304	2.43	0.0151
Added milk to filtered coffee	TFF1	0.5551	0.2443	2.2724	0.0231
Added milk to filtered coffee	CRHBP	-0.6517	0.2915	-2.2358	0.0254
Added milk to filtered coffee	Factor H	-0.4558	0.2148	-2.1219	0.0338
Added milk to filtered coffee	TPST2	-0.6621	0.3191	-2.0747	0.038
Added milk to filtered coffee	CATF	-0.4208	0.2066	-2.037	0.0416
Decaffeinated coffee	Periostin	0.9373	0.4705	1.9921	0.0464
Intake of sugar added to coffee	MUSK	-0.4351	0.2154	-2.0195	0.0434
Intake of sugar added to coffee	IGLL1	-0.4	0.1987	-2.013	0.0441
Coffee type 1	NRX1A	-0.5887	0.2095	-2.8101	0.005
Coffee type 1	MYPC1	0.5096	0.1973	2.5823	0.0098
Coffee type 1	DNJB9	0.2853	0.1354	2.1063	0.0352
Coffee type 2	MYPC1	-0.3964	0.1269	-3.1234	0.0018
Coffee type 2	Endocan	-0.3605	0.1325	-2.7216	0.0065
Coffee type 2	Factor I	0.2769	0.1119	2.4736	0.0134
Coffee type 2	IGFBP-2	-0.4979	0.2023	-2.4608	0.0139
Coffee type 2	MYOM2	-0.339	0.1434	-2.364	0.0181
Coffee type 2	NET4	-0.3173	0.1363	-2.3287	0.0199
Coffee type 2	Factor H	0.3273	0.1439	2.2754	0.0229
Coffee type 2	NOTUM	0.2853	0.1295	2.2023	0.0276
Coffee type 2	ARHGA	0.3332	0.1523	2.1882	0.0287
Coffee type 2	LTBP4	-0.4212	0.194	-2.1707	0.03
Coffee type 2	SIA7F	-0.3048	0.1436	-2.1226	0.0338
Coffee type 2	Apo L1	0.2192	0.1036	2.1164	0.0343
Coffee type 2	IL31R	0.3148	0.153	2.0583	0.0396
Coffee type 2	JAML1	0.3939	0.1934	2.0366	0.0417
Coffee type 2	GLPA	0.3578	0.1762	2.0312	0.0422
Coffee type 2	IL-17D	-0.256	0.1262	-2.0283	0.0425
Coffee type 2	PLOD3	-0.3291	0.1631	-2.0184	0.0435
Coffee type 2	TFF1	-0.2676	0.1342	-1.9937	0.0462
Coffee type 2	CRDL1	-0.3451	0.1732	-1.9928	0.0463
Coffee type 2	CD3E	0.4436	0.223	1.9896	0.0466
Coffee type 3	NRX1A	0.2845	0.1104	2.578	0.0099
Coffee type 3	CgA	0.253	0.1022	2.4759	0.0133
Coffee type 3	STOM	-0.1275	0.0531	-2.4024	0.0163
Coffee type 3	IGFBP-2	0.3839	0.1611	2.3824	0.0172
Coffee type 3	Factor H	-0.2505	0.1068	-2.3467	0.0189
Coffee type 3	MUSK	-0.2274	0.0999	-2.2764	0.0228
Coffee type 3	CO1A1	0.2348	0.1034	2.2706	0.0232
Coffee type 3	SIA7F	0.2589	0.1142	2.2663	0.0234
Coffee type 3	SP-C	0.2524	0.1124	2.2453	0.0248
Coffee type 3	CRDL1	0.3541	0.161	2.1994	0.0278
Coffee type 3	LTBP4	0.2854	0.1346	2.1206	0.034
Coffee type 3	Factor I	-0.2182	0.1034	-2.1105	0.0348
Coffee type 3	F163A	0.2681	0.1292	2.0751	0.038
Coffee type 3	ARHGA	-0.247	0.1218	-2.0274	0.0426
Coffee type 3	Endocan	0.1925	0.0956	2.0143	0.044
Coffee type 3	IL31R	-0.2782	0.1383	-2.0124	0.0442
Coffee type 3	TFF1	0.2241	0.1126	1.99	0.0466
Coffee type 3	resistin	-0.2026	0.1028	-1.9713	0.0487
Coffee type 3	NET4	0.1974	0.1004	1.9667	0.0492
Coffee type 4	SPAT9	0.9547	0.4215	2.2651	0.0235
Coffee type 4	IL-17D	0.7649	0.3619	2.1137	0.0345
Coffee type 4	MMP-14	-0.9899	0.5026	-1.9697	0.0489
Note:
p1: trait 1
p2: trait 2
rg: genetic association
se: standard error of rg
z: Z score of rg
p: P value of rg
Coffee type 1: Coffee type: Decaffeinated coffee (any type)
Coffee type 2: Coffee type: Instant coffee
Coffee type 3: Coffee type: Ground coffee (include espresso, filter etc)
Coffee type 4: Coffee type: Other type of coffee

## Sheet: Table S3
Supplementary table 3: significant genetic associations between coffee consumption and human plasma proteins in replication cohort
p1	p2	rg	se	z	p
Coffee consumption among drinkers	Carboxypeptidase B1	-0.6059	0.2149	-2.8193	0.0048
Coffee consumption among drinkers	SNAB	0.673	0.2471	2.7232	0.0065
extreme coffee trait	VAV3	-0.6144	0.2288	-2.685	0.0073
Coffee consumption among drinkers	Carbonic Anhydrase X	0.7335	0.2762	2.6562	0.0079
extreme coffee trait	Carbonic Anhydrase X	0.7067	0.2943	2.4013	0.0163
extreme coffee trait	Cytochrome P450 3A4	-0.7519	0.3148	-2.3884	0.0169
Coffee consumption among drinkers	P5I11	-0.7315	0.3078	-2.3766	0.0175
extreme coffee trait	NG36	0.669	0.2917	2.2932	0.0218
extreme coffee trait	SPARCL1	0.4057	0.1794	2.2622	0.0237
extreme coffee trait	RN148	-0.6453	0.2855	-2.2605	0.0238
Coffee consumption among drinkers	TMG1	0.5969	0.2673	2.2329	0.0256
Coffee consumption among drinkers	CO1A1	0.4422	0.1983	2.2296	0.0258
Coffee consumption among drinkers	MYPC1	0.4286	0.1948	2.2008	0.0277
extreme coffee trait	ERO1B	-0.5045	0.2334	-2.1613	0.0307
extreme coffee trait	PLOD3	-0.5846	0.2748	-2.1271	0.0334
extreme coffee trait	P5I11	-0.5762	0.2713	-2.1241	0.0337
Coffee consumption among drinkers	MYOM2	0.4044	0.1919	2.1069	0.0351
extreme coffee trait	RANTES	-0.4628	0.2216	-2.0883	0.0368
Coffee consumption among drinkers	ERO1B	-0.4303	0.2064	-2.0852	0.0371
Coffee consumption among drinkers	HBAT	-0.5533	0.2654	-2.085	0.0371
Coffee consumption among drinkers	LTBP4	0.6103	0.2939	2.0769	0.0378
extreme coffee trait	CLC2A	-0.5509	0.2655	-2.0752	0.038
Coffee consumption among drinkers	SIA7F	0.5461	0.2639	2.0693	0.0385
Coffee consumption among drinkers	F177A	0.4242	0.2051	2.0686	0.0386
extreme coffee trait	HBAT	-0.6097	0.2961	-2.0589	0.0395
extreme coffee trait	MYPC1	0.3904	0.1902	2.0528	0.0401
Coffee consumption among drinkers	Bone proteoglycan II	0.5464	0.2675	2.0428	0.0411
extreme coffee trait	L-plastin	0.3794	0.1861	2.0385	0.0415
extreme coffee trait	SIA7C	-0.5676	0.2807	-2.0221	0.0432
extreme coffee trait	DB118	-0.3859	0.1913	-2.0174	0.0437
Coffee consumption among drinkers	CHL1	0.5043	0.2501	2.0163	0.0438
Coffee consumption among drinkers	Trypsin 2	-0.4415	0.2225	-1.9843	0.0472
extreme coffee trait	SYFM	0.5481	0.2766	1.9815	0.0475
extreme coffee trait	SWP70	0.5583	0.2836	1.9686	0.049
extreme coffee trait	SAP	-0.4126	0.2098	-1.9669	0.0492
extreme coffee trait	AT1B2	0.4218	0.2146	1.9658	0.0493
Note:
p1: trait 1
p2: trait 2
rg: genetic association
se: standard error of rg
z: Z score of rg
p: P value of rg
extreme coffee trait: extreme coffee trait: heavy ('case') vs no/low ('control') regular coffee consumption

## Sheet: Table S4
Supplementary table 4: significant genetic associations between coffee consumption and human blood metabolites in discovery cohort
p1	p2	rg	se	z	p
Coffee intake	isovalerylcarnitine	0.1653	0.0564	2.9322	0.0034
Coffee intake	citrate	-0.1355	0.0546	-2.4802	0.0131
Coffee intake	X-11550	-0.1574	0.064	-2.46	0.0139
Coffee intake	X-14057	0.2548	0.1084	2.3512	0.0187
Coffee intake	3-methoxytyrosine	-0.259	0.1118	-2.3167	0.0205
Coffee intake	glutamate	0.2969	0.1356	2.1896	0.0286
Coffee intake	X-13741	0.2833	0.1339	2.1157	0.0344
Coffee intake	N1-methyladenosine	-0.1331	0.0657	-2.0269	0.0427
Coffee intake	X-11483	-0.4427	0.2257	-1.961	0.0499
Coffee consumed	X-13859	-0.3934	0.1412	-2.7856	0.0053
Coffee consumed	heptanoate	-0.3964	0.1512	-2.6209	0.0088
Coffee consumed	X-11423	-0.3228	0.1241	-2.6003	0.0093
Coffee consumed	pelargonate	-0.3893	0.1569	-2.4814	0.0131
Coffee consumed	X-13741	1.1149	0.4556	2.4471	0.0144
Coffee consumed	caproate	-0.3428	0.1436	-2.3873	0.017
Coffee consumed	X-12329	0.715	0.3081	2.3205	0.0203
Coffee consumed	isovalerylcarnitine	0.3877	0.1715	2.2604	0.0238
Coffee consumed	n-Butyl Oleate	-0.4626	0.2218	-2.0857	0.037
Coffee consumed	X-04498	0.5146	0.252	2.0423	0.0411
Coffee consumed	X-12040	0.7466	0.3699	2.0183	0.0436
Instant coffee intake	pelargonate	-0.5007	0.1863	-2.6878	0.0072
Instant coffee intake	1-arachidonoylglycerophosphoinositol*	-0.6076	0.2338	-2.5985	0.0094
Instant coffee intake	X-12038	-0.4171	0.1653	-2.5228	0.0116
Instant coffee intake	X-11550	-0.5397	0.2154	-2.505	0.0122
Instant coffee intake	X-11204	-0.4816	0.1945	-2.4763	0.0133
Instant coffee intake	heptanoate	-0.4299	0.1812	-2.3726	0.0177
Instant coffee intake	3-methyl-2-oxovalerate	-0.449	0.191	-2.3504	0.0188
Instant coffee intake	X-11327	-0.3226	0.1373	-2.3494	0.0188
Instant coffee intake	X-13215	-0.3253	0.1403	-2.3189	0.0204
Instant coffee intake	caprylate	-0.3626	0.1639	-2.2118	0.027
Instant coffee intake	kynurenine	-0.3322	0.151	-2.1998	0.0278
Instant coffee intake	X-12029	-0.7573	0.3515	-2.1542	0.0312
Instant coffee intake	2-hydroxystearate	-0.3492	0.1646	-2.1211	0.0339
Instant coffee intake	valine	-0.342	0.166	-2.0601	0.0394
Instant coffee intake	X-11799	-1.0379	0.5073	-2.0459	0.0408
Instant coffee intake	indolelactate	-0.4374	0.2214	-1.9752	0.0482
Instant coffee intake	pantothenate	-0.472	0.2404	-1.9633	0.0496
Added milk to instant coffee	X-13859	-0.7341	0.2854	-2.5716	0.0101
Added milk to instant coffee	indolelactate	-0.6388	0.274	-2.3314	0.0197
Filtered coffee intake	X-12329	0.6499	0.2831	2.2958	0.0217
Filtered coffee intake	inosine	0.5308	0.2453	2.1638	0.0305
Filtered coffee intake	1,5-anhydroglucitol	-0.2576	0.1201	-2.1443	0.032
Filtered coffee intake	X-12188	0.37	0.1755	2.1084	0.035
Filtered coffee intake	3-indoxyl	0.5275	0.2549	2.0692	0.0385
Filtered coffee intake	X-04498	0.3831	0.1878	2.0397	0.0414
Filtered coffee intake	phenylacetylglutamine	0.9069	0.4467	2.03	0.0424
Added milk to filtered coffee	X-12644	0.5723	0.1964	2.9143	0.0036
Added milk to filtered coffee	X-11593	0.2995	0.1193	2.5103	0.0121
Added milk to filtered coffee	X-01911	0.4948	0.223	2.2181	0.0265
Added milk to filtered coffee	caproate	-0.2472	0.1161	-2.1292	0.0332
Added milk to filtered coffee	tryptophan	0.1713	0.0834	2.0556	0.0398
Added milk to filtered coffee	phosphate	0.6265	0.3068	2.0419	0.0412
Added milk to filtered coffee	2-aminobutyrate	0.2128	0.1084	1.9637	0.0496
Decaffeinated coffee	indolelactate	-0.5853	0.2476	-2.364	0.0181
Decaffeinated coffee	levulinate	-0.399	0.1749	-2.281	0.0225
Decaffeinated coffee	1-arachidonoylglycerophosphoinositol*	-0.5613	0.2555	-2.1966	0.028
Decaffeinated coffee	X-11315	-0.6256	0.3166	-1.9759	0.0482
Intake of sugar added to coffee	tryptophan	0.2418	0.0885	2.7312	0.0063
Intake of sugar added to coffee	gamma-glutamyltyrosine	0.2952	0.1274	2.3179	0.0205
Intake of sugar added to coffee	1-palmitoylglycerophosphoethanolamine	-0.3703	0.1789	-2.0698	0.0385
Intake of sugar added to coffee	myo-inositol	-0.2177	0.1068	-2.0392	0.0414
Intake of sugar added to coffee	3-(4-hydroxyphenyl)lactate	0.3401	0.1725	1.9718	0.0486
Coffee type 1	X-08402	0.3441	0.1457	2.3628	0.0181
Coffee type 1	pyroglutamine*	0.367	0.1589	2.3106	0.0209
Coffee type 1	laurate	0.1715	0.0778	2.2044	0.0275
Coffee type 1	X-14588	-0.2176	0.1092	-1.9938	0.0462
Coffee type 1	3-methyl-2-oxovalerate	0.218	0.1112	1.9603	0.05
Coffee type 2	1,5-anhydroglucitol	0.2439	0.0681	3.5827	0.0003
Coffee type 2	X-11315	-0.4063	0.113	-3.5954	0.0003
Coffee type 2	propionylcarnitine	-0.2486	0.089	-2.7949	0.0052
Coffee type 2	myo-inositol	-0.162	0.0604	-2.683	0.0073
Coffee type 2	glutamine	-0.1977	0.0857	-2.3061	0.0211
Coffee type 2	citrate	0.1413	0.0632	2.2362	0.0253
Coffee type 2	pantothenate	-0.2214	0.0997	-2.2214	0.0263
Coffee type 2	tryptophan	-0.1155	0.0525	-2.199	0.0279
Coffee type 2	X-11423	0.1318	0.0629	2.0936	0.0363
Coffee type 2	X-12749	0.1337	0.0644	2.0762	0.0379
Coffee type 2	X-13859	-0.1419	0.0696	-2.0387	0.0415
Coffee type 2	X-02269	-0.3624	0.18	-2.0136	0.0441
Coffee type 2	X-13553	0.332	0.1669	1.9887	0.0467
Coffee type 2	3-methyl-2-oxovalerate	-0.1788	0.0902	-1.9814	0.0475
Coffee type 3	X-11315	0.3527	0.092	3.8334	0.0001
Coffee type 3	1,5-anhydroglucitol	-0.1949	0.0563	-3.4597	0.0005
Coffee type 3	citrate	-0.1532	0.0529	-2.8962	0.0038
Coffee type 3	propionylcarnitine	0.2187	0.0807	2.7091	0.0067
Coffee type 3	X-12749	-0.1405	0.0541	-2.5945	0.0095
Coffee type 3	myo-inositol	0.1208	0.0498	2.4271	0.0152
Coffee type 3	X-02269	0.3986	0.1705	2.3379	0.0194
Coffee type 3	1-palmitoylglycerol	-0.1528	0.0659	-2.3202	0.0203
Coffee type 3	X-12728	-0.3998	0.1726	-2.3157	0.0206
Coffee type 3	valine	0.1282	0.0605	2.1202	0.034
Coffee type 3	laurate	-0.1077	0.0514	-2.0966	0.036
Coffee type 3	histidine	0.1425	0.0691	2.0612	0.0393
Coffee type 3	X-08402	-0.14	0.0682	-2.0537	0.04
Coffee type 3	X-04499	-0.1981	0.0974	-2.0338	0.042
Coffee type 3	beta-hydroxyisovalerate	0.1921	0.0949	2.0252	0.0429
Coffee type 3	levulinate	0.0912	0.0452	2.0161	0.0438
Coffee type 3	X-11799	0.3274	0.1623	2.0164	0.0438
Coffee type 4	X-14626	0.5262	0.1978	2.6597	0.0078
Coffee type 4	X-12855	1.0191	0.424	2.4032	0.0163
Coffee type 4	2-aminobutyrate	-0.4155	0.1927	-2.1568	0.031
Note:
p1: trait 1
p2: trait 2
rg: genetic association
se: standard error of rg
z: Z score of rg
p: P value of rg
Coffee type 1: Coffee type: Decaffeinated coffee (any type)
Coffee type 2: Coffee type: Instant coffee
Coffee type 3: Coffee type: Ground coffee (include espresso, filter etc)
Coffee type 4: Coffee type: Other type of coffee

## Sheet: Table S5
Supplementary table 5: significant genetic associations between coffee consumption and human blood metabolites in replication cohort
p1	p2	rg	se	z	p
Coffee consumption among drinkers	n-Butyl Oleate	0.3534	0.1481	2.3865	0.017
Coffee consumption among drinkers	myo-inositol	-0.2238	0.0974	-2.2973	0.0216
Coffee consumption among drinkers	X-12719	-0.4664	0.2045	-2.2804	0.0226
Coffee consumption among drinkers	1-palmitoylglycerophosphoethanolamine	-0.3341	0.1467	-2.2781	0.0227
Coffee consumption among drinkers	X-11859	-0.4122	0.1903	-2.1662	0.0303
Coffee consumption among drinkers	X-11423	-0.1693	0.0807	-2.0975	0.036
Coffee consumption among drinkers	1-arachidonoylglycerophosphoinositol*	-0.2344	0.1168	-2.0057	0.0449
Note:
p1: trait 1
p2: trait 2
rg: genetic association
se: standard error of rg
z: Z score of rg
p: P value of rg

## Sheet: Table S6
Supplementary table 6：LDSC results of overlapping plasma proteins in the discovery and replication cohorts
	Coffee intake a			Coffee type 1 a			Coffee type 2 a			Coffee type 3 a			Instant coffee intake a			Added milk to filtered coffee a			Coffee consumption among drinkers b			Extreme coffee trait b
	rg	P		rg	P		rg	P		rg	P		rg	P		rg	P		rg	P		rg	P
CHL1	-	-		-	-		-	-		-	-		-	-		0.803	0.0151		0.5043	0.0438		-	-
CO1A1	-	-		-	-		-	-		0.2348	0.0232		-	-		-	-		0.4422	0.0258		-	-
F177A	0.1982	0.0278		-	-		-	-		-	-		-	-		-	-		0.4242	0.0386		-	-
LTBP4	-	-		-	-		-0.4212	0.03		0.2854	0.034		1.0026	0.0329		-	-		0.6103	0.0378		-	-
MYOM2	-	-		-	-		-0.339	0.0181		-	-		-	-		-	-		0.4044	0.0351		-	-
MYPC1	-	-		0.5096	0.0098		-0.3964	0.0018		-	-		-	-		-	-		0.4286	0.0277		0.3904	0.0401
P5I11	-0.3436	0.0335		-	-		-	-		-	-		-	-		-	-		-0.7315	0.0175		-0.5762	0.0337
PLOD3	-	-		-	-		-0.3291	0.0435		-	-		-	-		-	-		-	-		-0.5846	0.0334
RN148	-	-		-	-		-	-		-	-		-1.0076	0.0259		-	-		-	-		-0.6453	0.0258
SAP	-	-		-	-		-	-		-	-		-0.8859	0.0258		-	-		-	-		-0.4126	0.0492
SIA7F	-	-		-	-		-0.3048	0.0338		0.2589	0.0234		-	-		-	-		0.5461	0.0385		-	-
Note:
rg: Genetic association
p: P value of rg
a: The discovery cohort
b: The replication cohort
Coffee type 1: Coffee type: Decaffeinated coffee (any type)
Coffee type 2: Coffee type: Instant coffee
Coffee type 3: Coffee type: Ground coffee (include espresso, filter etc)
extreme coffee trait: extreme coffee trait: heavy ('case') vs no/low ('control') regular coffee consumption

## Sheet: Table S7
Supplementary table 7. LDSC results of overlapping blood metabolites in discovery and replication cohort.
	Coffee type 2 a			Coffee type 3 a			Coffee consumed a			Instant coffee intake a			Decaffeinated coffee a			Intake of sugar added to coffee a			Coffee consumption among drinkers b
	rg	P		rg	P		rg	P		rg	P		rg	P		rg	P		rg	P
n-Butyl Oleate	-	-		-	-		-0.4626	0.037		-	-		-	-		-	-		0.3534	0.017
myo-inositol	-0.162	0.0073		0.1208	0.0152		-	-		-	-		-	-		-0.2177	0.0414		-0.2238	0.0216
X-11423	0.1318	0.0363		-	-		-0.3228	0.0093		-	-		-	-		-	-		-0.1693	0.036
1-arachidonoylglycerophosphoinositol*	-	-		-	-		-	-		-0.6076	0.0094		-0.5613	0.028		-	-		-0.2344	0.0449
1-palmitoylglycerophosphoethanolamine	-	-		-	-		-	-		-	-		-	-		-0.3703	0.0385		-0.3341	0.0227
Note:
rg: Genetic association
p: P value of rg
a: The discovery cohort
b: The replication cohort
Coffee type 2: Coffee type: Instant coffee
Coffee type 3: Coffee type: Ground coffee (include espresso, filter etc)
